# Supplementary material
Source: MDPI journal article supplement (https://www.mdpi.com/2036-7481/12/3/37)
Supplement: s1 [file s1]

**Table S1:** Molecular identity of *Colletotrichum* sp. Corda EF 39 based on Internal Transcribed Spacer (ITS) sequence.

| MOLECULAR<br>IDENTITY          | PERCENT (%)<br>SIMILARITY | GenBank ACCESSION<br>NO.<br>OF CLOSEST HIT |
|--------------------------------|---------------------------|--------------------------------------------|
| <i>Colletotrichum siamense</i> | 100                       | MN556251.1                                 |
| <i>C. siamense</i>             | 100                       | MK568556.1                                 |
| <i>C. siamense</i>             | 100                       | MN295188.1                                 |
| <i>C. siamense</i>             | 100                       | MK779191.1                                 |
| <i>C. siamense</i>             | 100                       | MK779185.1                                 |
| <i>C. siamense</i>             | 100                       | MK457191.1                                 |
| <i>C. siamense</i>             | 100                       | MK471371.1                                 |
| <i>C. siamense</i>             | 100                       | MK968821.1                                 |
| <i>C. siamense</i>             | 100                       | MK955387.1                                 |
| <i>C. siamense</i>             | 100                       | MK934493.1                                 |
| <i>C. siamense</i>             | 100                       | MK934492.1                                 |
| <i>C. siamense</i>             | 100                       | MK914632.1                                 |
| <i>C. siamense</i>             | 100                       | MK914626.1                                 |
| <i>C. siamense</i>             | 100                       | MK914625.1                                 |
| <i>C. siamense</i>             | 100                       | MK790670.1                                 |
| <i>C. siamense</i>             | 100                       | MK790668.1                                 |
| <i>C. siamense</i>             | 100                       | MK790661.1                                 |
| <i>C. siamense</i>             | 100                       | MK790660.1                                 |
| <i>C. siamense</i>             | 100                       | MK790659.1                                 |
| <i>C. siamense</i>             | 100                       | MK790658.1                                 |
| <i>C. siamense</i>             | 100                       | MK790657.1                                 |
| <i>C. siamense</i>             | 100                       | MK790655.1                                 |
| <i>C. siamense</i>             | 100                       | MK790652.1                                 |
| <i>C. siamense</i>             | 100                       | MK790650.1                                 |
| <i>C. siamense</i>             | 100                       | MK790649.1                                 |
| <i>C. siamense</i>             | 100                       | MK790648.1                                 |
| <i>C. siamense</i>             | 100                       | MK790647.1                                 |
| <i>C. siamense</i>             | 100                       | MK790644.1                                 |
| <i>C. siamense</i>             | 100                       | MK790643.1                                 |
| <i>C. siamense</i>             | 100                       | MK790642.1                                 |
| <i>C. siamense</i>             | 100                       | MK758056.1                                 |
| <i>C. siamense</i>             | 100                       | MK693214.1                                 |
| <i>C. siamense</i>             | 100                       | MK685132.1                                 |
| <i>C. siamense</i>             | 100                       | MK673873.1                                 |
| <i>C. siamense</i>             | 100                       | MK673872.1                                 |
| <i>C. siamense</i>             | 100                       | MK614782.1                                 |
| <i>C. siamense</i>             | 100                       | MK569241.1                                 |

|                    |     |            |
|--------------------|-----|------------|
| <i>C. siamense</i> | 100 | MK569236.1 |
| <i>C. siamense</i> | 100 | MK569233.1 |
| <i>C. siamense</i> | 100 | MK569232.1 |
| <i>C. siamense</i> | 100 | MK340981.1 |
| <i>C. siamense</i> | 100 | MK340974.1 |
| <i>C. siamense</i> | 100 | MH370507.1 |
| <i>C. siamense</i> | 100 | MH270973.1 |
| <i>C. siamense</i> | 100 | MH270972.1 |
| <i>C. siamense</i> | 100 | MH270971.1 |
| <i>C. siamense</i> | 100 | MH270970.1 |
| <i>C. siamense</i> | 100 | MH270969.1 |
| <i>C. siamense</i> | 100 | MH270968.1 |
| <i>C. siamense</i> | 100 | MH270967.1 |
| <i>C. siamense</i> | 100 | MH270966.1 |
| <i>C. siamense</i> | 100 | MH270965.1 |
| <i>C. siamense</i> | 100 | MH270964.1 |
| <i>C. siamense</i> | 100 | MH636515.1 |
| <i>C. siamense</i> | 100 | MH636514.1 |
| <i>C. siamense</i> | 100 | MH636497.1 |
| <i>C. siamense</i> | 100 | MH636495.1 |
| <i>C. siamense</i> | 100 | MH636477.1 |
| <i>C. siamense</i> | 100 | MH636471.1 |
| <i>C. siamense</i> | 100 | MH636465.1 |
| <i>C. siamense</i> | 100 | MH636461.1 |
| <i>C. siamense</i> | 100 | MH636459.1 |
| <i>C. siamense</i> | 100 | MH636419.1 |
| <i>C. siamense</i> | 100 | MH636412.1 |

---
